# Supplementary material for: Comparison of Clinical Outcomes between Salvage and Elective Thoracic Endovascular Aortic Repair in Patients with Advanced Esophageal Cancer with Aortic Invasion: A Retrospective Cohort Study
Source: MDPI journal article supplement (doi:10.3390/biomedicines9121889), 2021-12-12
Supplement: s1 [file s1]

**Supplementary Table S1.** Multiple regression analysis of the length of survival time. Factors including pre-TEVAR esophagectomy and alcohol statistically significantly predicted the length of survival time.

|                          | Unstandardized Coefficients |                | Standardized Coefficients | T      | p-value |
|--------------------------|-----------------------------|----------------|---------------------------|--------|---------|
|                          | B                           | Standard Error |                           |        |         |
| Age                      | -5.389                      | 6.683          | -.151                     | -0.806 | 0.427   |
| BMI                      | -9.292                      | 17.646         | -.092                     | -0.527 | 0.603   |
| Sex                      | -18.241                     | 260.413        | -.013                     | -0.070 | 0.945   |
| ECOG                     | -66.339                     | 58.880         | -.222                     | -1.127 | 0.270   |
| Tumor Location           | 21.106                      | 102.471        | .037                      | 0.206  | 0.838   |
| Substance use            |                             |                |                           |        |         |
| Alcohol                  | -329.224                    | 149.509        | -.396                     | -2.202 | 0.036   |
| Betel nut                | 111.361                     | 135.820        | .154                      | 0.820  | 0.419   |
| Cigarette                | 126.799                     | 162.126        | .142                      | 0.782  | 0.441   |
| Comorbidity              |                             |                |                           |        |         |
| Coronary artery disease  | 434.508                     | 318.790        | .302                      | 1.363  | 0.184   |
| Chronic kidney disease   | 141.465                     | 254.529        | .098                      | 0.556  | 0.583   |
| Diabetes mellitus        | -157.580                    | 195.089        | -.138                     | -0.808 | 0.426   |
| Hypertension             | -33.723                     | 126.508        | -.048                     | -0.267 | 0.792   |
| Liver cirrhosis          | -125.027                    | 174.623        | -.127                     | -0.716 | 0.480   |
| COPD                     | -12.941                     | 180.470        | -.011                     | -0.072 | 0.943   |
| Cerebrovascular accident | -454.489                    | 461.793        | -.187                     | -0.984 | 0.334   |
| Others                   | 314.485                     | 424.164        | .129                      | 0.741  | 0.465   |
| Pre-TEVAR treatment      |                             |                |                           |        |         |
| Chemoradiotherapy        | -84.780                     | 125.941        | -.117                     | -0.673 | 0.507   |
| Esophagectomy            | 787.442                     | 294.602        | .452                      | 2.673  | 0.013   |

BMI: body mass index, ECOG: eastern cooperative oncology group performance status, TEVAR: thoracic endovascular aortic repair, COPD: chronic obstructive pulmonary disease

**Supplementary Table S2.** Cox regression analysis of groups and using alcohol for the overall 90-day survival (2A), aorta-related event-free 90-day survival (2B), and aorta-related event-free 180-day survival (2C). Alcohol is not a statistically significantly predictor for these survival analysis.

**(2A)**

|                               | Regression Coefficients | Standard Error | Odds Ratio (95% CI) | p-value |
|-------------------------------|-------------------------|----------------|---------------------|---------|
| Groups (Elective vs. Salvage) | 2.111                   | 0.798          | 8.259               | 0.008   |
| Substance use - Alcohol       | -0.053                  | 0.695          | 0.949               | 0.940   |

**(2B)**

|                               | Regression Coefficients | Standard Error | Odds Ratio (95% CI) | p-value |
|-------------------------------|-------------------------|----------------|---------------------|---------|
| Groups (Elective vs. Salvage) | 2.435                   | 0.778          | 11.420              | 0.002   |
| Substance use - Alcohol       | 0.464                   | 0.614          | 1.591               | 0.450   |

**(2C)**

|                               | Regression Coefficients | Standard Error | Odds Ratio (95% CI) | p-value |
|-------------------------------|-------------------------|----------------|---------------------|---------|
| Groups (Elective vs. Salvage) | 1.041                   | 0.435          | 2.833               | 0.017   |
| Substance use - Alcohol       | 0.238                   | 0.483          | 1.269               | 0.622   |
